# Supplementary material for: Evaluating aerosol and splatter following dental procedures: Addressing new challenges for oral health care and rehabilitation
Source: PubMed Central journal article supplement (PMC7537197; doi:10.1111/joor.13098), 2020-10-08
Supplement: JOOR-48-61-s003.pdf [file JOOR-48-61-s003.pdf]

# Evaluating aerosol and splatter following dental procedures: addressing new challenges for oral healthcare and rehabilitation

Allison JR, Currie CC, Edwards DC, Bowes C, Coulter J, Pickering K, Kozhevnikova E, Durham J, Nile CJ, Jakubovics N, Rostami N, Holliday R

Supplementary Table 1

| Position on operator/assistant/mannequin | Min         | Total surface area (mm <sup>2</sup> )         |                                               |                                                             |                                              |                                        | Fluorescence (RFU)                            |                                     |                                     |
|------------------------------------------|-------------|-----------------------------------------------|-----------------------------------------------|-------------------------------------------------------------|----------------------------------------------|----------------------------------------|-----------------------------------------------|-------------------------------------|-------------------------------------|
|                                          | Mean (SD)   | Anterior crown prep (no suction) <sup>†</sup> | Anterior crown prep with suction <sup>‡</sup> | Anterior crown prep with suction and assistant <sup>§</sup> | Ultrasonic scaling with suction <sup>¶</sup> | 3-in-1 spray with suction <sup>#</sup> | Anterior crown prep (no suction) <sup>†</sup> |                                     |                                     |
|                                          | Max         |                                               |                                               |                                                             |                                              |                                        | Initial collection                            | 30-40 min post-procedure collection | 60-70 min post-procedure collection |
| Sum [n]                                  |             |                                               |                                               |                                                             |                                              |                                        |                                               |                                     |                                     |
| Mannequin                                | Upper Left  | 98.69                                         | 105.02                                        | 370.96                                                      | 213.92                                       | 247.77                                 | 777                                           | 0                                   | 0                                   |
|                                          |             | <b>269.27</b>                                 | <b>162.92</b>                                 | <b>398.40</b>                                               | <b>269.82</b>                                | <b>371.86</b>                          | <b>43,286</b>                                 | <b>0</b>                            | <b>0</b>                            |
|                                          |             | (237.35)                                      | (61.11)                                       | (44.60)                                                     | (49.29)                                      | (121.58)                               | (51,113)                                      | (0)                                 | (0)                                 |
|                                          |             | 540.33                                        | 226.80                                        | 449.86                                                      | 307.01                                       | 490.78                                 | 100,000                                       | 0                                   | 0                                   |
|                                          |             | 807.81                                        | 488.77                                        | 1,195.19                                                    | 809.46                                       | 1,115.59                               | 129,858                                       | 0                                   | 0                                   |
|                                          |             | [3]                                           | [3]                                           | [3]                                                         | [3]                                          | [3]                                    | [3]                                           | [3]                                 | [2]                                 |
|                                          | Upper Right | 43.06                                         | 30.40                                         | 19.28                                                       | 88.91                                        | 41.35                                  | 997                                           | 0                                   | 0                                   |
|                                          |             | <b>111.44</b>                                 | <b>35.59</b>                                  | <b>28.71</b>                                                | <b>111.02</b>                                | <b>148.61</b>                          | <b>52,658</b>                                 | <b>0</b>                            | <b>0</b>                            |
|                                          |             | (59.47)                                       | (8.94)                                        | (10.68)                                                     | (35.16)                                      | (123.87)                               | (49,643)                                      | (0)                                 | (0)                                 |
|                                          |             | 151.13                                        | 45.91                                         | 40.30                                                       | 151.56                                       | 284.91                                 | 100,000                                       | 0                                   | 0                                   |
|                                          |             | 334.31                                        | 106.76                                        | 86.14                                                       | 333.06                                       | 445.83                                 | 157,973                                       | 0                                   | 0                                   |
|                                          |             | [3]                                           | [3]                                           | [3]                                                         | [3]                                          | [3]                                    | [3]                                           | [3]                                 | [2]                                 |
|                                          | Lower Left  | 14.07                                         | 4.48                                          | 10.46                                                       | 0.00                                         | 11.24                                  | 680                                           | 0                                   | 0                                   |
|                                          |             | <b>38.97</b>                                  | <b>9.77</b>                                   | <b>12.68</b>                                                | <b>0.01</b>                                  | <b>21.53</b>                           | <b>5,353</b>                                  | <b>0</b>                            | <b>0</b>                            |
|                                          |             | (29.90)                                       | (4.61)                                        | (2.43)                                                      | (0.02)                                       | (11.32)                                | (5,913)                                       | (0)                                 | (0)                                 |
|                                          |             | 72.13                                         | 12.97                                         | 15.27                                                       | 0.03                                         | 33.66                                  | 12,000                                        | 0                                   | 0                                   |
| 116.91                                   |             | 29.30                                         | 38.03                                         | 0.03                                                        | 64.59                                        | 16,058                                 | 0                                             | 0                                   |                                     |
|                                          | [3]         | [3]                                           | [3]                                           | [3]                                                         | [3]                                          | [3]                                    | [3]                                           | [3]                                 |                                     |
| Lower Right                              | 0.82        | 1.69                                          | 0.02                                          | 0.00                                                        | 1.38                                         | 743                                    | 0                                             | 0                                   |                                     |
|                                          | <b>2.75</b> | <b>4.11</b>                                   | <b>0.95</b>                                   | <b>0.01</b>                                                 | <b>3.87</b>                                  | <b>3,213</b>                           | <b>0</b>                                      | <b>0</b>                            |                                     |
|                                          | (2.65)      | (2.45)                                        | (0.96)                                        | (0.01)                                                      | (4.08)                                       | (3,572)                                | (0)                                           | (0)                                 |                                     |
|                                          | 5.77        | 6.59                                          | 1.94                                          | 0.02                                                        | 8.58                                         | 7309                                   | 0                                             | 0                                   |                                     |
|                                          | 8.25        | 12.34                                         | 2.85                                          | 0.02                                                        | 11.62                                        | 9639                                   | 0                                             | 0                                   |                                     |
|                                          | [3]         | [3]                                           | [3]                                           | [3]                                                         | [3]                                          | [3]                                    | [3]                                           | [3]                                 |                                     |
| Operator                                 | Head        | 0.00                                          | 0.08                                          | 0.00                                                        | 0.00                                         | 0.00                                   |                                               |                                     |                                     |
|                                          |             | <b>0.14</b>                                   | <b>0.53</b>                                   | <b>0.20</b>                                                 | <b>0.01</b>                                  | <b>0.00</b>                            |                                               |                                     |                                     |
|                                          |             | (0.19)                                        | (0.61)                                        | (0.34)                                                      | (0.01)                                       | (0.00)                                 |                                               |                                     |                                     |
|                                          |             | 0.27                                          | 1.23                                          | 0.60                                                        | 0.02                                         | 0.00                                   |                                               |                                     |                                     |
|                                          |             | 0.27                                          | 1.58                                          | 0.60                                                        | 0.02                                         | 0.00                                   |                                               |                                     |                                     |
|                                          |             | [2]                                           | [3]                                           | [3]                                                         | [3]                                          | [3]                                    |                                               |                                     |                                     |
|                                          | Left chest  | 469.58                                        | 269.52                                        | 222.95                                                      | 206.68                                       | 19.51                                  |                                               |                                     |                                     |
|                                          |             | <b>535.70</b>                                 | <b>484.97</b>                                 | <b>423.03</b>                                               | <b>308.71</b>                                | <b>76.51</b>                           |                                               |                                     |                                     |
|                                          |             | (59.23)                                       | (199.98)                                      | (212.60)                                                    | (89.07)                                      | (50.68)                                |                                               |                                     |                                     |
|                                          |             | 583.91                                        | 664.65                                        | 646.27                                                      | 370.95                                       | 116.46                                 |                                               |                                     |                                     |
| 1,607.11                                 |             | 1,454.90                                      | 1,269.10                                      | 926.12                                                      | 229.53                                       |                                        |                                               |                                     |                                     |
|                                          | [3]         | [3]                                           | [3]                                           | [3]                                                         | [3]                                          |                                        |                                               |                                     |                                     |
| Right chest                              | 0.53        | 0.00                                          | 0.00                                          | 1.38                                                        | 0.01                                         |                                        |                                               |                                     |                                     |
|                                          | <b>2.83</b> | <b>2.02</b>                                   | <b>0.50</b>                                   | <b>11.25</b>                                                | <b>7.04</b>                                  |                                        |                                               |                                     |                                     |
|                                          | (3.71)      | (3.40)                                        | (0.85)                                        | (8.74)                                                      | (6.42)                                       |                                        |                                               |                                     |                                     |
|                                          | 7.12        | 5.95                                          | 1.49                                          | 18.01                                                       | 12.58                                        |                                        |                                               |                                     |                                     |
|                                          | 8.50        | 6.07                                          | 1.50                                          | 33.75                                                       | 6.34                                         |                                        |                                               |                                     |                                     |
|                                          | [3]         | [3]                                           | [3]                                           | [3]                                                         | [3]                                          |                                        |                                               |                                     |                                     |

# Evaluating aerosol and splatter following dental procedures: addressing new challenges for oral healthcare and rehabilitation

Allison JR, Currie CC, Edwards DC, Bowes C, Coulter J, Pickering K, Kozhevnikova E, Durham J, Nile CJ, Jakubovics N, Rostami N, Holliday R

Supplementary Table 1

|                   |               |               |               |               |               |
|-------------------|---------------|---------------|---------------|---------------|---------------|
| Left arm          | 558.02        | 638.73        | 352.45        | 9.05          | 1.74          |
|                   | <b>638.17</b> | <b>660.86</b> | <b>527.30</b> | <b>17.02</b>  | <b>9.04</b>   |
|                   | (77.48)       | (27.20)       | (157.84)      | (8.46)        | (7.87)        |
|                   | 712.67        | 691.23        | 659.26        | 25.89         | 17.37         |
|                   | 1,875.91      | 1,982.57      | 1,581.91      | 51.07         | 27.11         |
|                   | [3]           | [3]           | [3]           | [3]           | [3]           |
| Right arm         | 0.00          | 0.79          | 0.01          | 2.35          | 0.01          |
|                   | <b>9.59</b>   | <b>1.05</b>   | <b>0.60</b>   | <b>11.25</b>  | <b>7.04</b>   |
|                   | (8.57)        | (0.40)        | (1.01)        | (13.47)       | (6.42)        |
|                   | 16.51         | 1.51          | 1.76          | 26.75         | 12.58         |
|                   | 28.78         | 3.15          | 1.79          | 33.74         | 21.12         |
|                   | [3]           | [3]           | [3]           | [3]           | [3]           |
| Left leg          | 0.00          | 0.00          | 0.00          | 40.44         | 77.98         |
|                   | <b>0.03</b>   | <b>1.28</b>   | <b>30.92</b>  | <b>194.70</b> | <b>173.71</b> |
|                   | (334.69)      | (2.09)        | (46.90)       | (208.73)      | (118.20)      |
|                   | 579.72        | 3.70          | 84.89         | 432.20        | 305.83        |
|                   | 579.75        | 3.85          | 92.75         | 584.09        | 521.12        |
|                   | [3]           | [3]           | [3]           | [3]           | [3]           |
| Right leg         | 0.00          | 0.00          | 0.00          | 0.00          | 0.00          |
|                   | <b>0.76</b>   | <b>0.02</b>   | <b>0.01</b>   | <b>0.14</b>   | <b>1.06</b>   |
|                   | (0.31)        | (0.03)        | (0.02)        | (0.02)        | (1.00)        |
|                   | 2.27          | 0.05          | 0.03          | 0.04          | 2.00          |
|                   | 2.27          | 0.05          | 0.03          | 0.04          | 3.19          |
|                   | [3]           | [3]           | [3]           | [3]           | [3]           |
| Visor-upper right | 0.00          | 0.00          | 0.00          | 0.00          | 0.00          |
|                   | <b>0.02</b>   | <b>0.01</b>   | <b>0.03</b>   | <b>0.01</b>   | <b>0.00</b>   |
|                   | (0.03)        | (0.02)        | (0.05)        | (0.02)        | (0.00)        |
|                   | 0.05          | 0.03          | 0.09          | 0.03          | 0.00          |
|                   | 0.07          | 0.03          | 0.09          | 0.03          | 0.00          |
|                   | [3]           | [3]           | [3]           | [3]           | [3]           |
| Visor-upper mid   | 0.00          | 0.00          | 0.00          | 0.00          | 0.00          |
|                   | <b>0.19</b>   | <b>0.10</b>   | <b>0.01</b>   | <b>0.01</b>   | <b>0.00</b>   |
|                   | (0.62)        | (0.17)        | (0.02)        | (0.01)        | (0.00)        |
|                   | 1.16          | 0.30          | 0.03          | 0.02          | 0.00          |
|                   | 1.35          | 0.30          | 0.03          | 0.02          | 0.00          |
|                   | [3]           | [3]           | [3]           | [3]           | [3]           |
| Visor-upper left  | 0.00          | 0.00          | 0.00          | 0.00          | 0.00          |
|                   | <b>0.79</b>   | <b>0.01</b>   | <b>0.01</b>   | <b>0.01</b>   | <b>0.00</b>   |
|                   | (0.96)        | (0.02)        | (0.01)        | (0.01)        | (0.00)        |
|                   | 1.86          | 0.03          | 0.02          | 0.03          | 0.00          |
|                   | 2.36          | 0.03          | 0.03          | 0.03          | 0.00          |
|                   | [3]           | [3]           | [3]           | [3]           | [3]           |
| Visor-lower left  | 8.33          | 0.09          | 0.12          | 0.00          | 0.00          |
|                   | <b>12.74</b>  | <b>8.02</b>   | <b>1.84</b>   | <b>0.83</b>   | <b>0.01</b>   |
|                   | (4.63)        | (6.86)        | (2.89)        | (1.02)        | (0.01)        |
|                   | 17.56         | 12.00         | 5.18          | 1.97          | 0.02          |
|                   | 38.22         | 24.05         | 5.52          | 2.49          | 0.02          |
|                   | [3]           | [3]           | [3]           | [3]           | [3]           |
| Visor-lower mid   | 348.98        | 17.92         | 11.41         | 74.03         | 0.00          |
|                   | <b>444.87</b> | <b>63.61</b>  | <b>70.51</b>  | <b>96.06</b>  | <b>12.43</b>  |
|                   | (137.03)      | (47.68)       | (101.58)      | (33.92)       | (19.89)       |
|                   | 601.81        | 113.05        | 187.78        | 135.12        | 35.37         |
|                   | 1,334.60      | 190.82        | 211.53        | 288.19        | 37.30         |

# Evaluating aerosol and splatter following dental procedures: addressing new challenges for oral healthcare and rehabilitation

Allison JR, Currie CC, Edwards DC, Bowes C, Coulter J, Pickering K, Kozhevnikova E, Durham J, Nile CJ, Jakubovics N, Rostami N, Holliday R

Supplementary Table 1

|                   |             |              |              |             |             |
|-------------------|-------------|--------------|--------------|-------------|-------------|
|                   | [3]         | [3]          | [3]          | [3]         | [3]         |
| Visor-lower right | 0.01        | 0.00         | 0.00         | 0.00        | 0.00        |
|                   | <b>0.15</b> | <b>0.01</b>  | <b>0.04</b>  | <b>0.01</b> | <b>0.00</b> |
|                   | (0.23)      | (0.02)       | (0.04)       | (0.01)      | (0.00)      |
|                   | 0.42        | 0.03         | 0.09         | 0.02        | 0.00        |
|                   | 0.45        | 0.03         | 0.12         | 0.02        | 0.00        |
|                   | [3]         | [3]          | [3]          | [3]         | [3]         |
| Mask- left        |             |              | 0.00         |             |             |
|                   |             |              | <b>0.03</b>  |             |             |
|                   |             |              | (0.03)       |             |             |
|                   |             |              | 0.06         |             |             |
|                   |             |              | 0.10         |             |             |
|                   |             | [3]          |              |             |             |
| Mask- mid         |             |              | 0.00         |             |             |
|                   |             |              | <b>0.00</b>  |             |             |
|                   |             |              | (0.01)       |             |             |
|                   |             |              | 0.01         |             |             |
|                   |             |              | 0.01         |             |             |
|                   |             | [3]          |              |             |             |
| Mask- right       |             |              | 0.00         |             |             |
|                   |             |              | <b>0.00</b>  |             |             |
|                   |             |              | (0.01)       |             |             |
|                   |             |              | 0.01         |             |             |
|                   |             |              | 0.01         |             |             |
|                   |             | [3]          |              |             |             |
| Assistant         | Head        |              | 0.00         |             |             |
|                   |             |              | <b>0.01</b>  |             |             |
|                   |             |              | (0.01)       |             |             |
|                   |             |              | 0.02         |             |             |
|                   |             |              | 0.02         |             |             |
|                   |             | [3]          |              |             |             |
|                   | Left chest  |              | 0.12         |             |             |
|                   |             |              | <b>21.94</b> |             |             |
|                   |             |              | (37.70)      |             |             |
|                   |             |              | 65.46        |             |             |
|                   |             |              | 65.81        |             |             |
|                   |             | [3]          |              |             |             |
|                   | Right chest |              | 0.04         |             |             |
|                   |             |              | <b>0.14</b>  |             |             |
|                   |             |              | (0.14)       |             |             |
|                   |             | 0.30         |              |             |             |
|                   |             | 0.42         |              |             |             |
|                   | [3]         |              |              |             |             |
| Left arm          |             | 0.00         |              |             |             |
|                   |             | <b>11.52</b> |              |             |             |
|                   |             | (15.37)      |              |             |             |
|                   |             | 28.97        |              |             |             |
|                   |             | 34.56        |              |             |             |
|                   | [3]         |              |              |             |             |
| Right arm         |             | 0.10         |              |             |             |
|                   |             | <b>4.29</b>  |              |             |             |
|                   |             | (3.99)       |              |             |             |

# Evaluating aerosol and splatter following dental procedures: addressing new challenges for oral healthcare and rehabilitation

Allison JR, Currie CC, Edwards DC, Bowes C, Coulter J, Pickering K, Kozhevnikova E, Durham J, Nile CJ, Jakubovics N, Rostami N, Holliday R

Supplementary Table 1

|                   |             |
|-------------------|-------------|
|                   | 8.04        |
|                   | 12.87       |
|                   | [3]         |
| Left leg          | 0.08        |
|                   | <b>0.58</b> |
|                   | (0.48)      |
|                   | 1.04        |
|                   | 1.74        |
|                   | [3]         |
| Right leg         | 0.00        |
|                   | <b>0.37</b> |
|                   | (0.64)      |
|                   | 1.12        |
|                   | 1.12        |
|                   | [3]         |
| Visor-upper right | 0.00        |
|                   | <b>0.00</b> |
|                   | (0.00)      |
|                   | 0.00        |
|                   | 0.00        |
|                   | [3]         |
| Visor-upper mid   | 0.00        |
|                   | <b>0.00</b> |
|                   | (0.00)      |
|                   | 0.00        |
|                   | 0.00        |
|                   | [3]         |
| Visor-upper left  | 0.00        |
|                   | <b>0.00</b> |
|                   | (0.00)      |
|                   | 0.00        |
|                   | 0.00        |
|                   | [3]         |
| Visor-lower left  | 0.00        |
|                   | <b>0.00</b> |
|                   | (0.00)      |
|                   | 0.00        |
|                   | 0.00        |
|                   | [3]         |
| Visor-lower mid   | 0.00        |
|                   | <b>0.02</b> |
|                   | (0.03)      |
|                   | 0.05        |
|                   | 0.05        |
|                   | [3]         |
| Visor-lower right | 0.00        |
|                   | <b>0.00</b> |
|                   | (0.01)      |
|                   | 0.01        |
|                   | 0.01        |
|                   | [3]         |
| Mask- left        | 0.00        |

# Evaluating aerosol and splatter following dental procedures: addressing new challenges for oral healthcare and rehabilitation

Allison JR, Currie CC, Edwards DC, Bowes C, Coulter J, Pickering K, Kozhevnikova E, Durham J, Nile CJ, Jakubovics N, Rostami N, Holliday R

**Supplementary Table 1**

|             |             |
|-------------|-------------|
|             | <b>0.01</b> |
|             | (0.01)      |
|             | 0.01        |
|             | 0.01        |
|             | [3]         |
| Mask- mid   | 0.00        |
|             | <b>0.00</b> |
|             | (0.00)      |
|             | 0.00        |
|             | 0.00        |
|             | [3]         |
| Mask- right | 0.00        |
|             | <b>0.02</b> |
|             | (0.04)      |
|             | 0.07        |
|             | 0.07        |
|             | [3]         |

Supplementary Table 1. summary of surface area and spectrofluorometric data collected from the mannequin, operator and assistant. Each location represents three repetitions. RFU: relative fluorescence units.

† Anterior crown preparation on upper right central incisor without suction or assistant. 10 minutes duration.

‡ Anterior crown preparation on upper right central incisor with suction. 10 minutes duration.

§ Anterior crown preparation on upper right central incisor with suction and assistant. 10 minutes duration.

¶ Full mouth ultrasonic scaling with suction. 10 minutes duration.

# 3-in-1 spray with suction of a MO cavity in upper right first premolar tooth. 30 second duration to replicate washing acid etchant.
